# Supplementary material
Source: publisher figshare collection journal article supplement (https://acs.figshare.com/ndownloader/files/5503472)
Supplement: Supplementary file 1 [file 5503472]

# Supporting Information

## Boric Acid Assisted Reduction of Graphene Oxide: A Promising Material for Sodium-ion Batteries

*Ying Wang,<sup>1,4</sup> Caiyun Wang,<sup>3</sup> Yijing Wang,<sup>2\*</sup> Huakun Liu,<sup>4</sup> Zhenguo Huang<sup>4\*</sup>*

<sup>1</sup>School of Chemistry and Chemical Engineering, Jiangsu Key Laboratory of Green Synthetic Chemistry for Functional Materials, Jiangsu Normal University, Xuzhou, Jiangsu 221116, China.

<sup>2</sup>Collaborative Innovation Centre of Chemical Science and Engineering (Tianjin), Key Laboratory of Advanced Energy Materials Chemistry (MOE), Nankai University, Tianjin 300071, China. E-mail: wangyj@nankai.edu.cn

<sup>3</sup>Intelligent Polymer Research Institute, ARC Centre of Excellence for Electromaterials Science, University of Wollongong, Wollongong, NSW 2522, Australia.

<sup>4</sup>Institute for Superconducting and Electronic Materials, University of Wollongong, Wollongong, NSW 2522, Australia. E-mail: zhenguo@uow.edu.au.

## 1. Characterization

X-ray diffraction (XRD, GBC eMMA, Cu K $\alpha$  radiation,  $\lambda = 1.5406 \text{ \AA}$ ), X-ray photoelectron spectroscopy (XPS, VG Scientific ESCALAB 2201XL, Al K $\alpha$  X-ray radiation), Fourier transform infrared spectroscopy (FTIR, Shimadzu Prestige-21), nitrogen-sorption isothermal analysis (NOVA 2200e, Quantachrome), and Raman spectroscopy (Jobin Yvon HR800 Raman spectrometer with a 10 mW helium/neon laser at 632.8 nm excitation) were used to determine the structure and composition of samples. Scanning electron microscopy (SEM, JEOL JSM7500FA), transmission electron microscopy (TEM), and high-resolution TEM (HR-TEM, JEOL JEM-2010FEF) were used for morphological investigations.

## 2. Electrochemical measurements

The electrochemical performances were evaluated by using standard 2032 type coin cells. The working electrodes were fabricated with 80 wt% active materials, 10 wt% acetylene black (Super P), and 10 wt% sodium carboxymethyl cellulose (CMC) in deionized water to form a slurry, which was then cast onto copper foil and dried in dynamic vacuum at 60 °C overnight. Higher temperatures could cause further dehydration in BF-rGO and consequently, an unwanted smaller interlayer spacing. A sodium disc was used as the counter electrode. The electrodes were separated by glass fiber. Electrolytes consisting of 1 M NaClO<sub>4</sub> in three different solvents were used to optimize the electrochemical performance: (1) 1,2-dimethoxyethane (DME); (2) ethylene carbonate (EC) and diethyl carbonate (DEC) (EC:DEC, 1:1, v:v ); (3) EC:DEC with the addition of 5 % fluorinated ethylene carbonate (FEC) (EC:DEC:FEC). The cells were assembled in an argon filled glove box with the oxygen and water content below 1 ppm. Galvanostatic charge-discharge tests were carried out on a

battery testing system (Shenzhen NEWARE Battery, China) in the voltage range between 0.001 and 2.00 V. Electrochemical impedance spectroscopy (EIS) measurements were performed on a Biologic VMP-3 electrochemical workstation. The capacity was calculated based on the active materials.

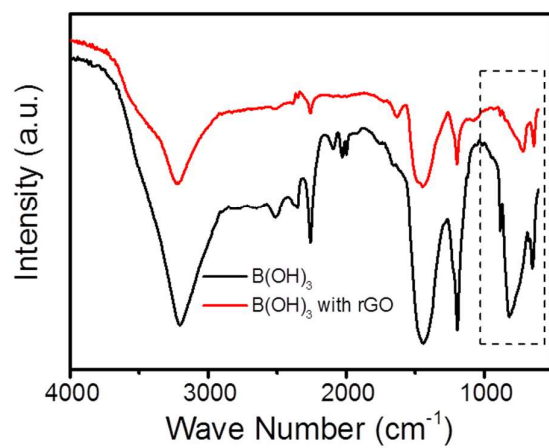

**Figure S1** FTIR spectra of boric acid and freeze-dried mixture of boric acid and GO. The rectangle part shows the red shift of B–O–H out-of-plane bending, and O–B–O ring bending.

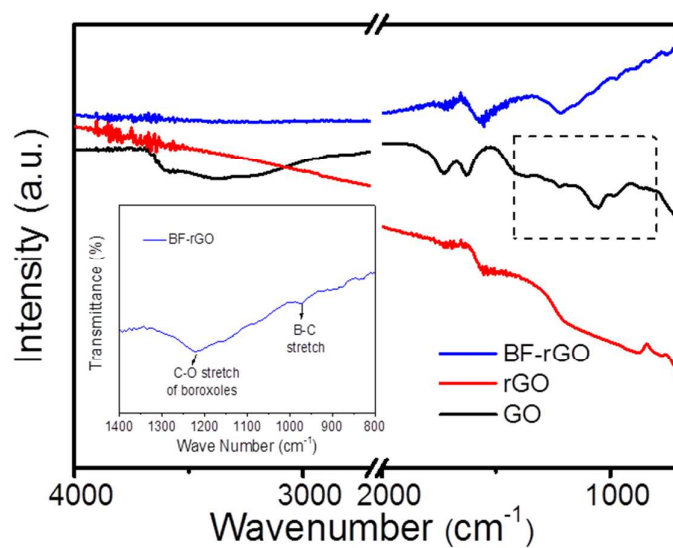

**Figure S2** FTIR spectra of the GO, rGO, and BF-rGO samples. Inset is an enlargement of the dashed rectangle. After the reduction, most of the oxygen-containing groups in GO disappeared. The appearance of two peaks in the BF-rGO sample at 1215 and 968 cm<sup>-1</sup> indicates the formation of C–O–B and C–B bonds, respectively.

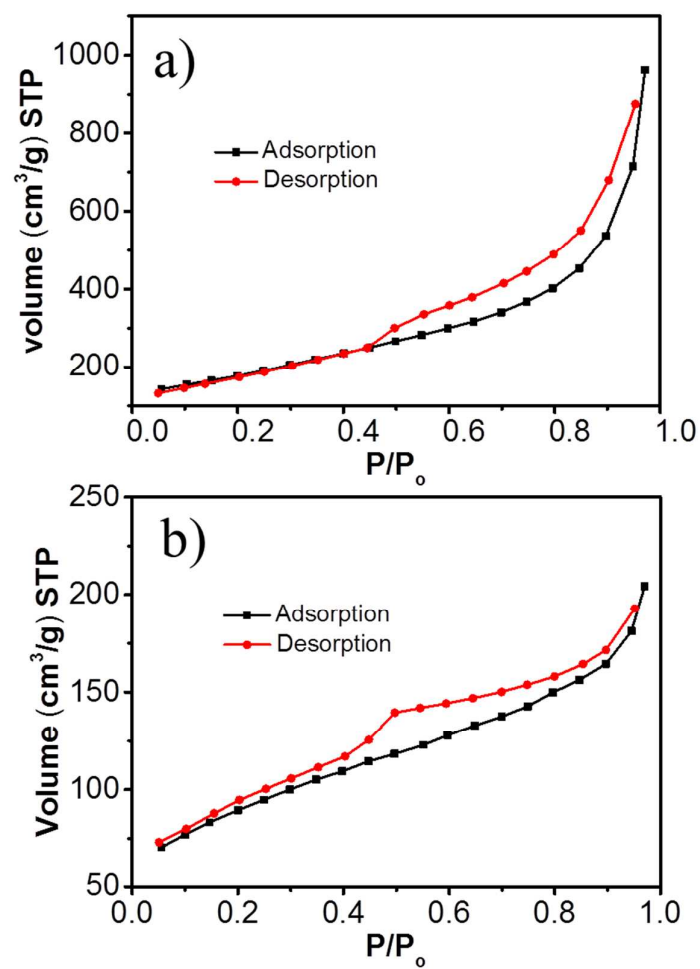

**Figure S3** Nitrogen adsorption and desorption isotherms of (a) the pure rGO and (b) the as-obtained BF-rGO. The decreased surface area of the BF-rGO indicates the successful functionalization of rGO.

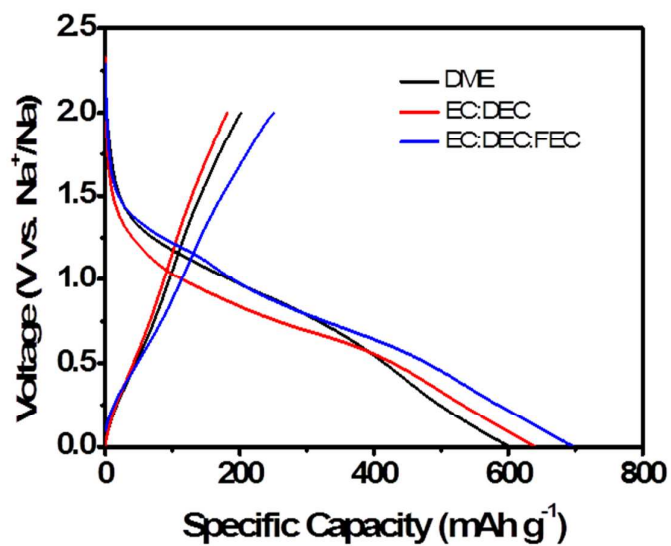

**Figure S4** First cycle discharge-charge profiles for the BF-rGO/Na half cells in different electrolytes.

**Table S1** Specific capacity for selected cycles of the Na/BF-rGO half cells.

| Electrolyte | Capacity (mAh·g <sup>-1</sup> ) |                 |                 |                  |                   |
|-------------|---------------------------------|-----------------|-----------------|------------------|-------------------|
|             | 1 <sup>st</sup>                 | 2 <sup>nd</sup> | 5 <sup>th</sup> | 10 <sup>th</sup> | 115 <sup>th</sup> |
| DME         | 601                             | 212             | 189             | 173              | 142               |
| EC:DEC      | 640                             | 191             | 168             | 159              | 128               |
| EC:DEC:FEC  | 685                             | 239             | 183             | 182              | 180               |



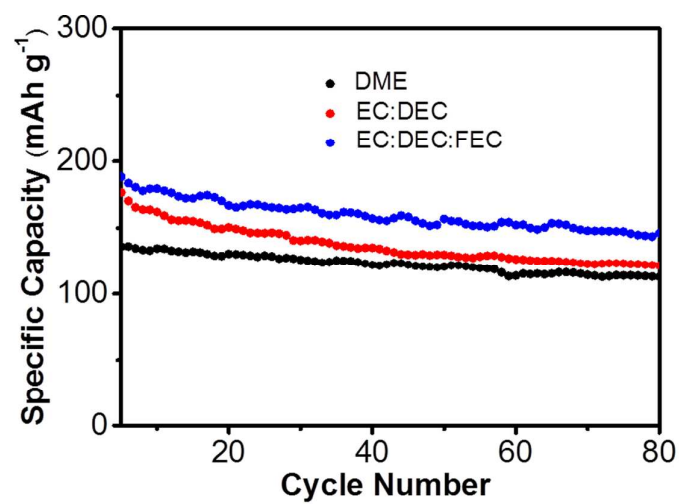

**Figure S5** Cycling stability of the pure rGO electrode in different electrolytes.

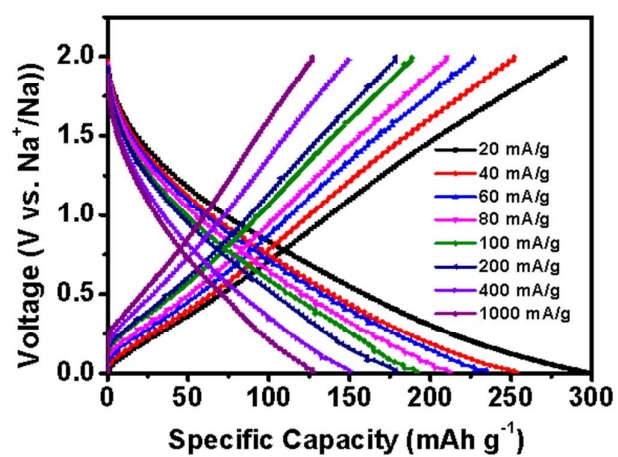

**Figure S6** Discharge-charge curves of the Na/BF-rGO half cells at different current density.

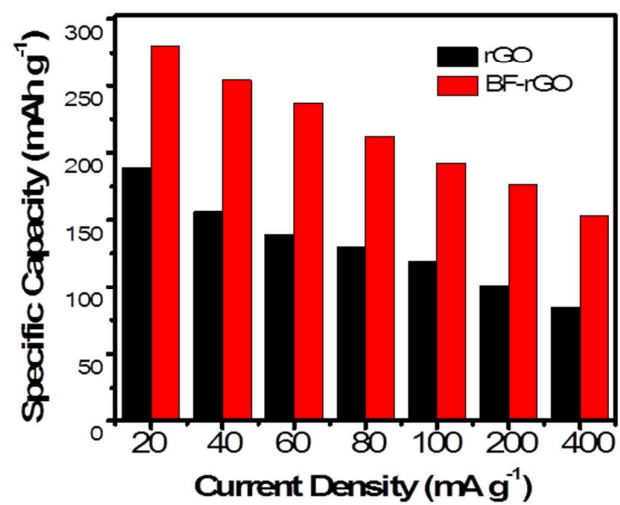

**Figure S7** Rate capability of Na/rGO and Na/BF-rGO half cells.

**Table S2** Parameters used to fit the Nyquist plots.

| Sample | $R_s$ | CPE-T                | CPE-P | $R_{ct}$ | $W_o$ -R | $W_o$ -T | $W_o$ -P |
|--------|-------|----------------------|-------|----------|----------|----------|----------|
| rGO    | 30    | $1.8 \times 10^{-6}$ | 0.9   | 1509     | 22246    | 104.5    | 0.46     |
| BF-rGO | 10.5  | $4.5 \times 10^{-6}$ | 0.8   | 586      | 10487    | 25       | 0.31     |

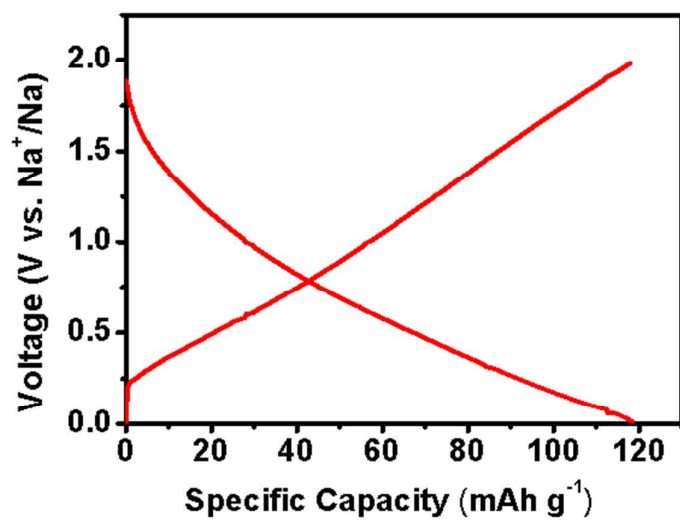

**Figure S8** Discharge/charge voltage profile for the BF-rGO electrode after 5000 cycles.

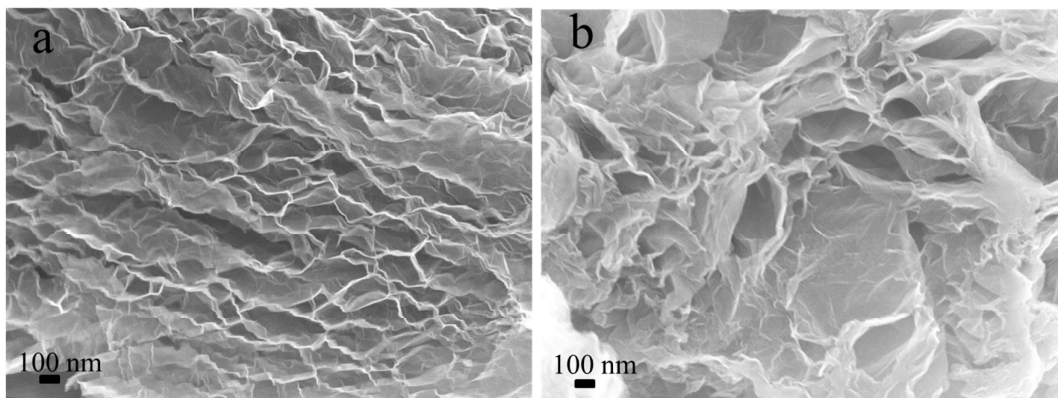

**Figure S9** SEM images of (a) rGO and (b) BF-rGO.
